# Supplementary material for: Extraction and characterization of collagen and gelatin from body wall of sea cucumbers Stichopus horrens and Holothuria arenicola
Source: PeerJ. 2024 Oct 10;12:e18149. doi: 10.7717/peerj.18149 (PMC11471148; doi:10.7717/peerj.18149)
Supplement: Supplemental Information 1 [file peerj-12-18149-s001.xlsx]

## Sheet: Sheet1
										Minors (Cs H)*	Childrens	Minors (CsS)*	Adults (CsS)*	Adults (CsH)*
		EAA	% of EAA in H. arenicola	% of EAA in S .horrens	mg of hydrolysed protein	EAA in childrens	EAA in minors	EAA in adults	Chiled (Cs H)*		(CsS)*
		His	0.5	0.5	10	19	26	10	26.3158	19.2308	26.3158	19.2308	50	50
		Ile	1.9	2.2	10	28	46	20	67.8571	41.3043	78.5714	47.8261	110	95
		Leu	1.9	1.8	10	66	93	39	28.7879	20.4301	27.2727	19.3548	46.1538	48.7179
		Lys	0.7	0.8	10	58	66	30	12.069	10.6061	13.7931	12.1212	26.6667	23.3333
		Met+Cys	0.8	0.8	10	25	42	10	32	19.0476	32	19.0476	80	80
		Phe+Tyr	0.7	0.8	10	63	72	25	11.1111	9.72222	12.6984	11.1111	32	28
		Trp	0	0	10	11	17	4	0	0	0	0	0	0
		Thr	3.6	3.4	10	34	43	15	105.882	83.7209	100	79.0698	226.667	240
		Val	2.3	2.4	10	35	55	26	65.7143	41.8182	68.5714	43.6364	92.3077	88.4615
